# Supplementary material
Source: PubMed Central journal article supplement (PMC6364524)
Supplement: CJN.07670618SupplementaryData.pdf [file CJN.07670618SupplementaryData.pdf]

**Supplemental Material**

**Prioritizing Symptoms of ESKD Patients Receiving In-Center Hemodialysis for the Development of Therapeutic Interventions**

**January 8-10, 2018  
Capital Hilton  
1001 16<sup>th</sup> St NW  
Washington, DC 20026**

**Supplemental Table 1.** Stakeholder meeting participants.

| <b>Name</b>         | <b>Affiliation</b>                             | <b>Stakeholder Position</b>                           |
|---------------------|------------------------------------------------|-------------------------------------------------------|
| Emaad Abdel-Rahman* | University of Virginia                         | Nephrologist, Patient                                 |
| Deborah Benner      | DaVita, Inc.                                   | Dialysis Organization Representative                  |
| Daniel Cukor        | SUNY Downstate Medical Center                  | Psychologist, Research Content Expert                 |
| Lamer Davis         | Baltimore, MD                                  | Care Partner                                          |
| Jennifer Flythe*    | University of North Carolina at Chapel Hill    | Nephrologist                                          |
| Jon Friedman        | Optum                                          | Payer Representative                                  |
| Tony Houston        | Baltimore, MD                                  | Patient                                               |
| Paris Jackson       | Baltimore, MD                                  | Patient                                               |
| Manisha Jhamb       | University of Pittsburgh                       | Nephrologist                                          |
| Kirsten Johansen    | University of California at San Francisco      | Nephrologist                                          |
| James Kochert       | Washington, DC                                 | Patient                                               |
| Marta Novak         | University of Toronto                          | Psychiatrist, Research Content Expert                 |
| Dugan Maddux        | Fresenius Medical Care- North America          | Dialysis Organization Representative, Nephrologist    |
| Rajnish Mehrotra*   | University of Washington                       | Nephrologist                                          |
| Klemens Meyer       | Tufts University<br>Dialysis Clinic, Inc.      | Nephrologist,<br>Dialysis Organization Representative |
| Amy Barton Pai*     | University of Michigan                         | Clinical Pharmacist                                   |
| Nikunj Patel        | U.S. Food and Drug Administration (FDA)        | Government                                            |
| Matthew Rivara*     | University of Washington                       | Nephrologist                                          |
| Jesse Roach         | Centers for Medicare & Medicaid Services (CMS) | Government, Payer Representative                      |
| Wendy L. St. Peter* | University of Minnesota                        | Clinical Pharmacist                                   |
| Steven D. Weisbord* | University of Pittsburgh                       | Nephrologist                                          |
| Caroline Wilkie*    | Punta Gorda, FL                                | Patient                                               |

*Supplemental material is neither peer-reviewed nor thoroughly edited by CJASN. The authors alone are responsible for the accuracy and presentation of the material.*

|                  |                                  |             |
|------------------|----------------------------------|-------------|
| Shan Xing        | Amgen, Inc.                      | Industry    |
|                  |                                  |             |
| Melissa West     | Kidney Health Initiative         | Organizer   |
| Rick Kempinski   | Kidney Health Initiative         | Organizer   |
| Tandrea Hilliard | American Institutes for Research | Facilitator |
| Elena Lumby      | American Institutes for Research | Facilitator |
| Yan Wang         | American Institutes for Research | Notetaker   |
| Kshitij Verma    | American Institutes for Research | Notetaker   |
| Brianna Ellis    | American Institutes for Research | Notetaker   |
| Maria Elsberg    | American Institutes for Research | Notetaker   |

\* Members of the Kidney Health Initiative Prioritizing Symptoms of ESKD Patients for Developing Therapeutic Interventions workgroup.

Supplemental material is neither peer-reviewed nor thoroughly edited by CJASN. The authors alone are responsible for the accuracy and presentation of the material.

**Supplemental Figure 1.** Process for developing symptom-specific action plans for insomnia, cramping and fatigue.

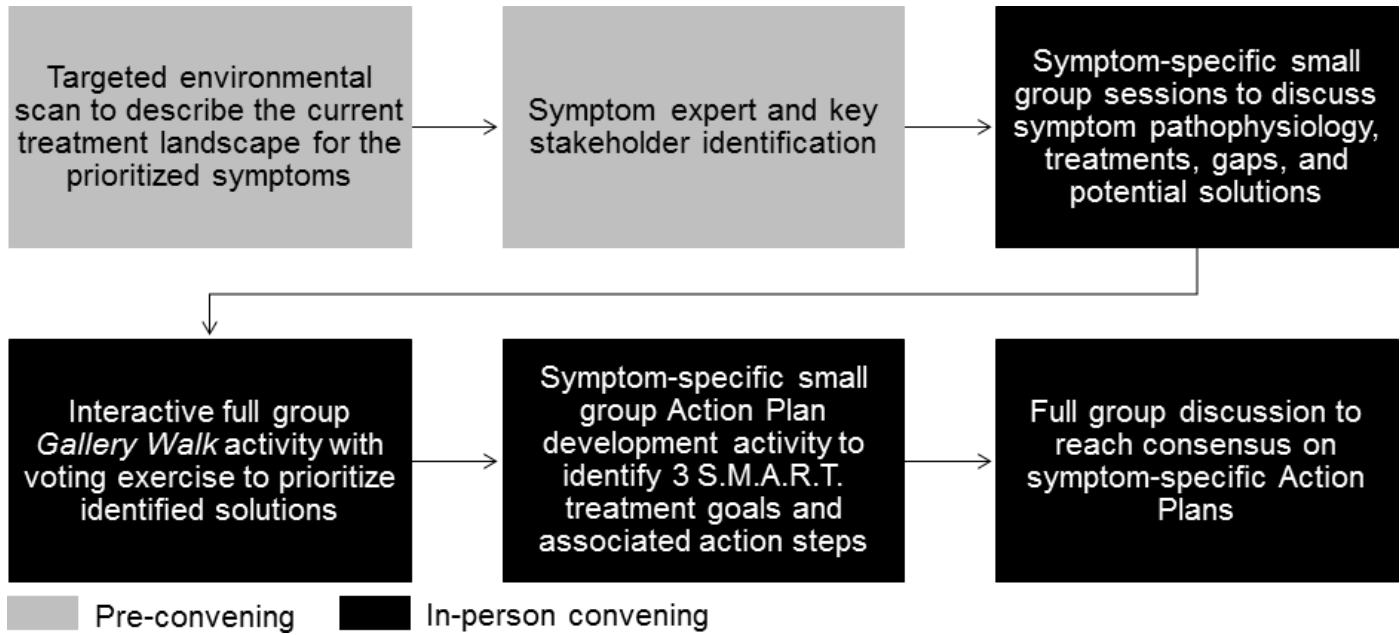

During the stakeholder meeting, participants developed Action Plans for each of the three prioritized physical symptoms. The process of Action Plan development included a targeted environmental scan, engagement of symptom experts and dialysis stakeholders, and participant discussions about existing treatments, knowledge gaps, barriers to innovation and opportunities for the development of new therapeutic approaches.

Abbreviations: S.M.A.R.T., specific, measurable, achievable, results-focused, and time-bound.
